# Supplementary material for: Post-Translational Regulation of Oct4 Transcriptional Activity
Source: PLoS One. 2009 Feb 16;4(2):e4467. doi: 10.1371/journal.pone.0004467 (PMC2637973; doi:10.1371/journal.pone.0004467)
Supplement: Table S2 — Verified Oct4 PORE targets (0.03 MB XLS) [file pone.0004467.s003.xls]

## Sheet: verified PORE targets
input_id	locus link id	symbol	gene_name	nm_accn	unigene_id
235344	235344	Snf1lk2	SNF1-like kinase 2	NM_178710	Mm.104932
59058	59058	Bhlhb5	basic helix-loop-helix domain containing, class B5	NM_021560	Mm.149938
70948	70948	Wdr20b	WD repeat domain 20b	NM_027614	Mm.219475
327766	327766	Tmem26	transmembrane protein 26	NM_177794	Mm.72096
23882	23882	Gadd45g	growth arrest and DNA-damage-inducible 45 gamma	NM_011817	Mm.281298
13417	13417	Dnahc8	dynein, axonemal, heavy chain 8	NM_013811	Mm.426017
80857	80857	Fgf20	fibroblast growth factor 20	NM_030610	Mm.425526
28071	28071	Twistnb	TWIST neighbor	NM_172253	Mm.196472///Mm.413045
20393	20393	Sgk	serum/glucocorticoid regulated kinase	NM_011361	Mm.28405
71701	71701	Pnpt1	polyribonucleotide nucleotidyltransferase 1	NM_027869	Mm.211131
17931	17931	Ppp1r12a	protein phosphatase 1, regulatory (inhibitor) subunit 12A	NM_027892	Mm.207499///Mm.422959
13134	13134	Dach1	dachshund 1 (Drosophila)	NM_007826///NM_001038610	Mm.320593
17311	17311	Kitl	kit ligand	NM_013598	Mm.45124
12224	12224	Klf5	Kruppel-like factor 5	NM_009769	Mm.30262
20464	20464	Sim1	single-minded homolog 1 (Drosophila)	NM_011376	Mm.4774
114712	114712	Ferd3l	Fer3-like (Drosophila)	NM_033522	Mm.204643
216749	216749	Nmur2	neuromedin U receptor 2	NM_153079	Mm.213205
327814	327814	Ppfia2	protein tyrosine phosphatase, receptor type, f polypeptide (PTPRF), interacting protein (liprin), alpha 2	NM_177373	Mm.125555///Mm.391424
13131	13131	Dab1	disabled homolog 1 (Drosophila)	NM_010014///NM_177259	Mm.289682
22240	22240	Dpysl3	dihydropyrimidinase-like 3	NM_009468	Mm.8180///Mm.428551///Mm.431827
18708	18708	Pik3r1	phosphatidylinositol 3-kinase, regulatory subunit, polypeptide 1 (p85 alpha)	NM_001024955///NM_001077495	Mm.259333
270118	270118	Maml2	mastermind like 2 (Drosophila)		Mm.116898///Mm.393962
23967	23967	Osr1	odd-skipped related 1 (Drosophila)	NM_011859	Mm.45055
21412	21412	Tcf21	transcription factor 21	NM_011545	Mm.16497
72780	72780	Rspo3	R-spondin 3 homolog (Xenopus laevis)	NM_028351	Mm.45191
17967	17967	Ncam1	neural cell adhesion molecule 1	NM_010875	Mm.4974
268294	268294	Zbtb24	zinc finger and BTB domain containing 24	NM_153398	Mm.258475///Mm.332534
94109	94109	Csmd1	CUB and Sushi multiple domains 1	NM_053171	Mm.419813
238205	238205	Lrfn5	leucine rich repeat and fibronectin type III domain containing 5	NM_178714	Mm.28802
217232	217232	Cdc27	cell division cycle 27 homolog (S. cerevisiae)		Mm.89845///Mm.426478
